# Supplementary material for: Modulation of Photosynthesis and ROS Scavenging Response by Beneficial Bacteria in Olea europaea Plantlets under Salt Stress Conditions
Source: MDPI journal article supplement (doi:10.3390/plants11202748), 2022-10-17
Supplement: s1 [file s1]

Supplementary Materials:

Figure S1: Proline contents in AS and AQ

Figure S2: Total phenols in AS and AQ

**Figure S1.** Proline concentration.

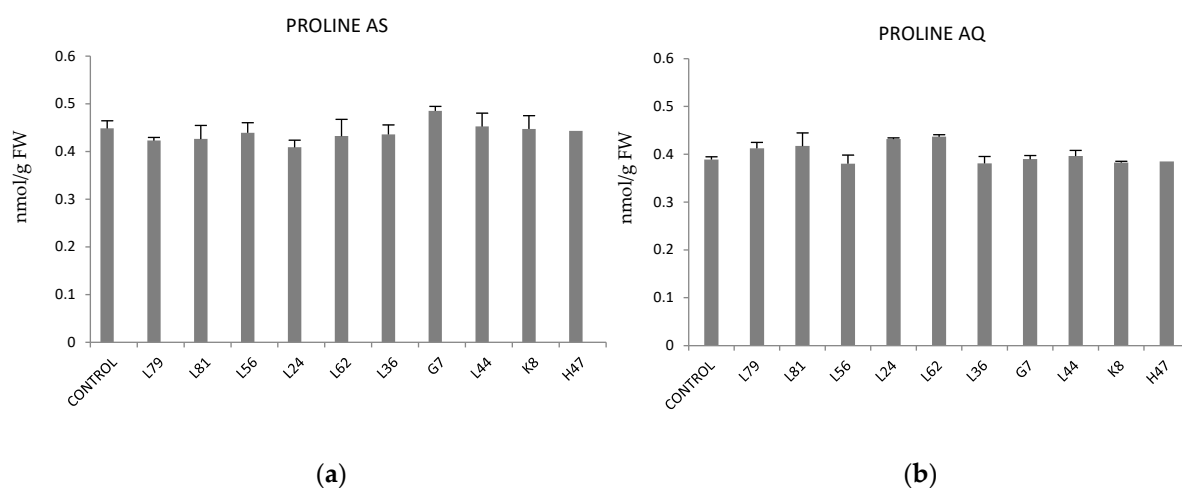

**Figure S1.** Proline (nmol/g fresh weight) in olive leaves **(a)** var. AS and **(b)** var. AQ, inoculated with the 10 PBPB and non-inoculated controls. Values are the average  $\pm$  SE ( $n=6$ ). There are no significant differences according to T-STUDENT test.

**Figure S2.** Total phenol concentration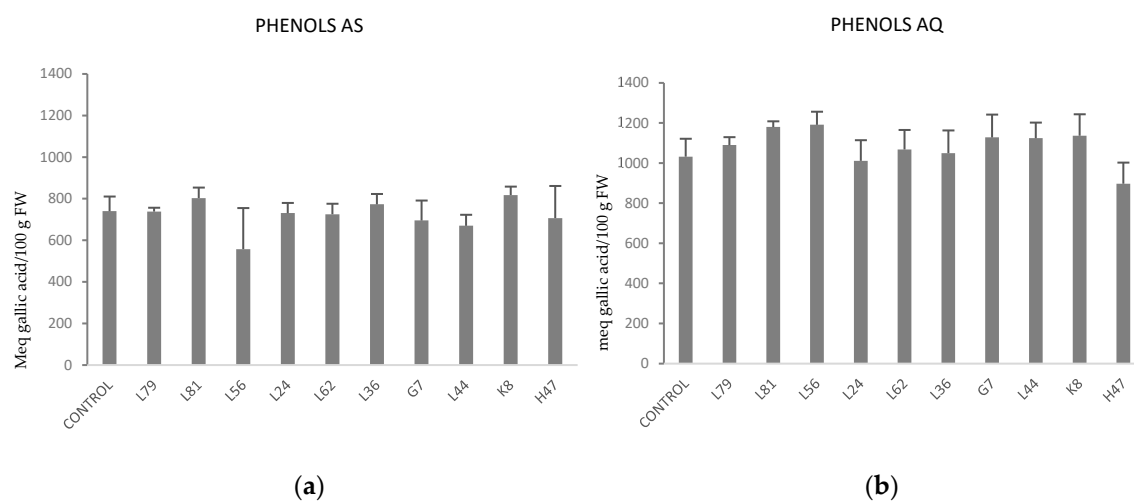

**Figure S2.** Total phenol concentration (meq gallic acid/100 g fresh weight) in olive leaves **(a)** var. AS and **(b)** var. AQ, inoculated with the 10 PBPB and non-inoculated controls. Values are the average  $\pm$  SE (n=6). There are no significant differences according to T-STUDENT test.
